# Supplementary material for: Temperature-sensitive cathode materials for safer lithium-ion batteries
Source: Royal Society of Chemistry journal article supplement (doi:10.1039/c0ee00590h), 2011-01-01
Supplement: c0ee00590h.pdf [file c0ee00590h.pdf]

Supplementary Material (ESI) for Energy & Environmental Science

## Electronic supplementary information:

### Temperature-Sensitive Cathode Materials for Safer Lithium-ion Batteries

Lan Xia, Su-Li Li, Xin-Ping Ai \*, Han-Xi Yang, Yu-Liang Cao

#### CONTENTS

1. Experimental details 2
2. Logarithmic conductivity of doped polythiophene (PTH), poly (3-butylthiophene) (P3BT) and poly (3-decylthiophene) (P3DT) at various temperature 3
3. The charge and discharge curves of uncoated LiCoO<sub>2</sub> electrode at constant rate of 40 mA g<sup>-1</sup>. 4
4. Nyquist impedance spectra of the P3DT@LiCoO<sub>2</sub> electrode 5

## Experimental details:

*Materials synthesis:* P3DT used in this study was synthesized by chemically oxidative polymerization of 3-decylthiophene monomer in chloroform using  $\text{FeCl}_3$  as a catalyst. The as-prepared P3DT was washed with methanol and then added into a mixture of chloroform and monohydrate hydrazine for de-doping under magnetic stirring. Finally, the de-doped polymer was extracted with methanol in a Soxhlet extractor for removing the residual oxidant and oligomers.

P3DT- $\text{LiCoO}_2$  composite in this study was designed to contain 10 wt % P3DT and prepared via a spray drying method. A typical procedure is to add commercial  $\text{LiCoO}_2$  powder (Fenghua Lithium battery Co., Ltd. Zhaoqing, China) into a P3DT- $\text{CH}_2\text{Cl}_2$  solution in a weight ratio of P3DT: $\text{LiCoO}_2 = 1:9$  at mild stirring to form the well-dispersed suspension and then spray-dry the suspension into powdered particles using SD-1500 Laboratory Scale Spray Drier (TriDwin Tech. Co., Shanghai, China).

*Materials characterization:* The surface morphology of the P3DT- $\text{LiCoO}_2$  particles was characterized by transmission electron microscopy (TEM, JEOL-2010). The resistance of the composite cathode were measured directly by a digital multi-meter using a thin cathode film sandwiched between two parallel Ni plates at temperature of 20 to 130°C. The positive electrodes were prepared by mixing 90wt.%  $\text{LiCoO}_2$  @P3DT powder or  $\text{LiCoO}_2$  powder, 3wt.% acetylene black and 7wt.% PTFE (poly tetrafluoroethylene) into a paste and roll-pressing the mixed paste into about 200  $\mu\text{m}$  thick film, finally, pressing the electrode film into an aluminum grid.

All the electrochemical characterization for pure  $\text{LiCoO}_2$  cathode and P3DT- $\text{LiCoO}_2$  cathode were carried out using coin cells with lithium sheet as counter electrode. The electrolyte solution was 1M  $\text{LiPF}_6$  in ethylene carbonate (EC)-dimethyl carbonate (DMC) (1:1 by vol.), purchased from Guotai-Huarong New Chemical Materials Co., Ltd. (Zhangjiagang, China). The cells were assembled in an argon-filled glove box. The charge and discharge measurements were performed using a programmable computer-controlled battery charger (CT2001A Land Battery Testing System, Wuhan, China) at a voltage interval of 4.30~3.0 V. Cyclic voltammetry measurements were conducted on a CHI660 electrochemical workstation (Chenhua Instrument Co., Shanghai, China) at a scan rate of 0.1  $\text{mV s}^{-1}$ .

Temperature dependence of the DC conductivity for doped polythiophene (PTH), poly (3-butylthiophene) (P3BT) and poly (3-decylthiophene) (P3DT) .

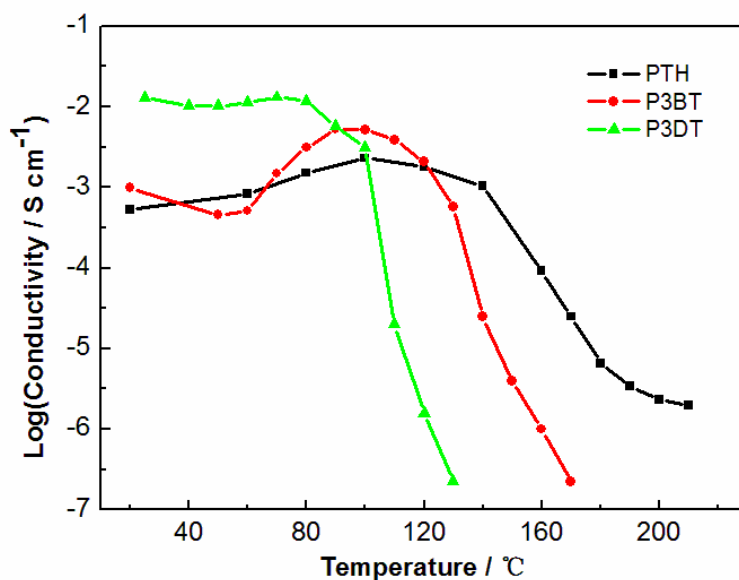

**Figure S1.** Logarithmic conductivity of doped polythiophene (PTH), poly (3-butylthiophene) (P3BT) and poly (3-decylthiophene) (P3DT) at various temperature

The charge and discharge curves of uncoated  $\text{LiCoO}_2$  electrode at constant rate of  $40 \text{ mA g}^{-1}$ .

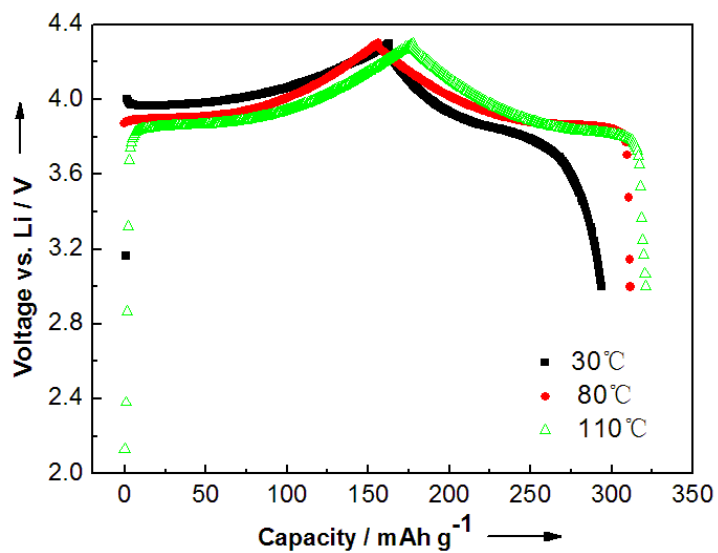

**Figure S2.** The charge and discharge curves of uncoated  $\text{LiCoO}_2$  electrode at constant rate of  $40 \text{ mA g}^{-1}$ .

Nyquist impedance spectra of the P3DT@LiCoO<sub>2</sub> composite electrode at different temperatures

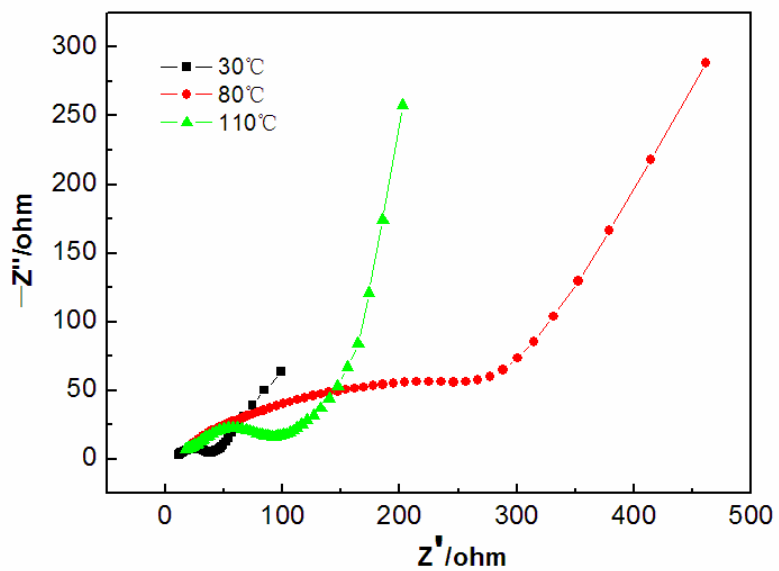

**Figure S3.** Nyquist impedance spectra of the P3DT@LiCoO<sub>2</sub> composite electrode at different temperatures.
